# Supplementary material for: Anti-inflammatory and anti-oxidant properties of Melianodiol on DSS-induced ulcerative colitis in mice
Source: PeerJ. 2022 Oct 25;10:e14209. doi: 10.7717/peerj.14209 (PMC9615967; doi:10.7717/peerj.14209)
Supplement: Supplemental Information 2 — Weight growth, colonic length, DAI Score [file peerj-10-14209-s002.xlsx]

## Sheet: Sheet1
Weight growth rate/%	Control	8.46561	5.88235	5.33981	8.24742	0.531915	9.67742	6.55738
	DSS	-27.4611	-23.1088	-16.8783	-25.2747	-23.6181	-16.3366	-27.7487
	500 mg/kg 5-ASA	-15.0259	8.28729	-12.1053	-22.8426	-23.4375	-8.76289	-2.63158
	50 mg/kg MN	-8.94737	-14.5	-21.6667	-24.6305	-16.9231	-17.5532	-14.5631
	100 mg/kg MN	-31.2821	-7.57576	-20.8556	-4.73684	-14.2857	-10.8374	-7.03518
	200 mg/kg MN	8.33333	-5.58376	-11.413	-13.2353	-13.0653	-6.03015	-10.8911
Colonic length /cm	Control	8.2	6.4	8.1	8.2	7.2	8.2	8
	DSS	4.3	3.6	4.1	4	4.1	4.1	5.4
	500 mg/kg 5-ASA	6.8	7	5.5	6	5.8	5.1	7.1
	50 mg/kg MN	5.1	7.4	5.4	5.2	4.5	6.5	5.3
	100 mg/kg MN	7.2	7.2	5.7	6.7	5.8	7.3	6.4
	200 mg/kg MN	7.4	7.1	7.4	7	7	7.3	6.5
DAI Score	Control	0	0	0	0	0	0	0
	DSS	4	4	4	4	4	4	3
	500 mg/kg 5-ASA	3	3	4	3	2	4	2
	50 mg/kg MN	4	2	3	4	3	2	4
	100 mg/kg MN	4	3	3	1	2	2	1
	200 mg/kg MN	0	1	0	1	1	0	1
