# Supplementary material for: Anti-inflammatory and anti-oxidant properties of Melianodiol on DSS-induced ulcerative colitis in mice
Source: PeerJ. 2022 Oct 25;10:e14209. doi: 10.7717/peerj.14209 (PMC9615967; doi:10.7717/peerj.14209)
Supplement: Supplemental Information 4 — NO, GSH, MDA, SOD [file peerj-10-14209-s004.xlsx]

## Sheet: Sheet1
		NO (mmol/mg prot)					GSH (mmol/gprot)					MDA (nmol/gprot)					SOD (U/gprot)
	Control	12.1	13.5	10.5		Control	7.5833	8.81782	8.47986		Control	0.31	0.45	0.16917		Control	10.7805	10.8351	11.8727
	DSS	35.2	32.6	37.4		DSS	1.95288	1.11922	1.62209		DSS	2.13	1.9	2.3		DSS	4.49815	2.0308	1.8375
	500 mg/kg 5-ASA	19	21.74	20.6		500 mg/kg 5-ASA	5.23474	6.66721	5.74075		500 mg/kg 5-ASA	1	0.81	1.19		500 mg/kg 5-ASA	7.38563	8.36709	9.66105
	50 mg/kg MN	31.3	29.1	32.9		50 mg/kg MN	3.4	4.7	5.1		50 mg/kg MN	1.42	1.09	1.31		50 mg/kg MN	6.50318	7.40315	6.95
	100 mg/kg MN	25.1	22.8	27.2		100 mg/kg MN	5.7	7.4	6.5		100 mg/kg MN	1.23	0.9	1.21		100 mg/kg MN	9.41	8.42	8.89
	200 mg/kg MN	16.2	14.5	17.5		200 mg/kg MN	6.9	7.8	8.4		200 mg/kg MN	0.74	0.92	0.68		200 mg/kg MN	9.43424	10.4609	10.13
