# Supplementary material for: Anti-inflammatory and anti-oxidant properties of Melianodiol on DSS-induced ulcerative colitis in mice
Source: PeerJ. 2022 Oct 25;10:e14209. doi: 10.7717/peerj.14209 (PMC9615967; doi:10.7717/peerj.14209)
Supplement: Supplemental Information 5 — IL-1β, IL-10, TNF-a [file peerj-10-14209-s005.xlsx]

## Sheet: Sheet1
		IL-1β (pg/mg)					IL-10 (pg/mg)					TNF-a (pg/mg)
	Control	19.53	21.83	15.91		Control	35.21	29.81	37.92		Control	8.09	9.91	5.79
	DSS	41.41	45.71	35.89		DSS	14.11	18.9	14.78		DSS	17.78	16.71	22.19
	500 mg/kg 5-ASA	33.31	36.87	28.83		500 mg/kg 5-ASA	25.01	23.78	20.88		500 mg/kg 5-ASA	11.55	8.97	14.31
	50 mg/kg MN	37.71	35.12	33.17		50 mg/kg MN	21.13	24.35	27.5		50 mg/kg MN	18.01	19.97	16.02
	100 mg/kg MN	30.52	28.27	24.23		100 mg/kg MN	27.21	31.71	29.09		100 mg/kg MN	13.41	10.43	15.29
	200 mg/kg MN	24.73	20.13	17.14		200 mg/kg MN	33.21	34.61	31.26		200 mg/kg MN	10.03	7.91	4.97
